# Supplementary material
Source: MDPI journal article supplement (https://www.mdpi.com/2076-0760/10/8/311)
Supplement: s1 [file s1]

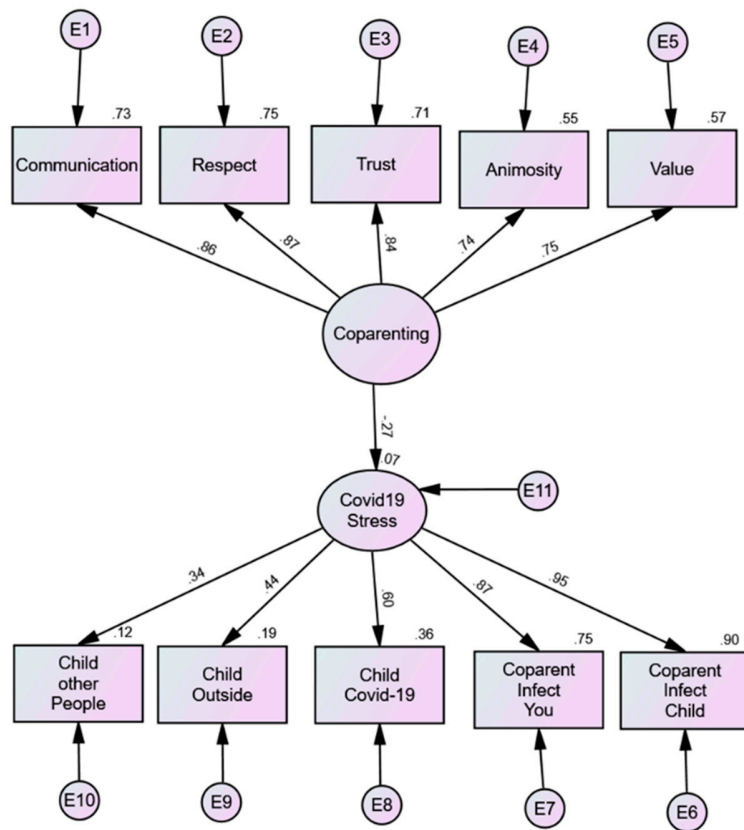

Figure S1. full sample.

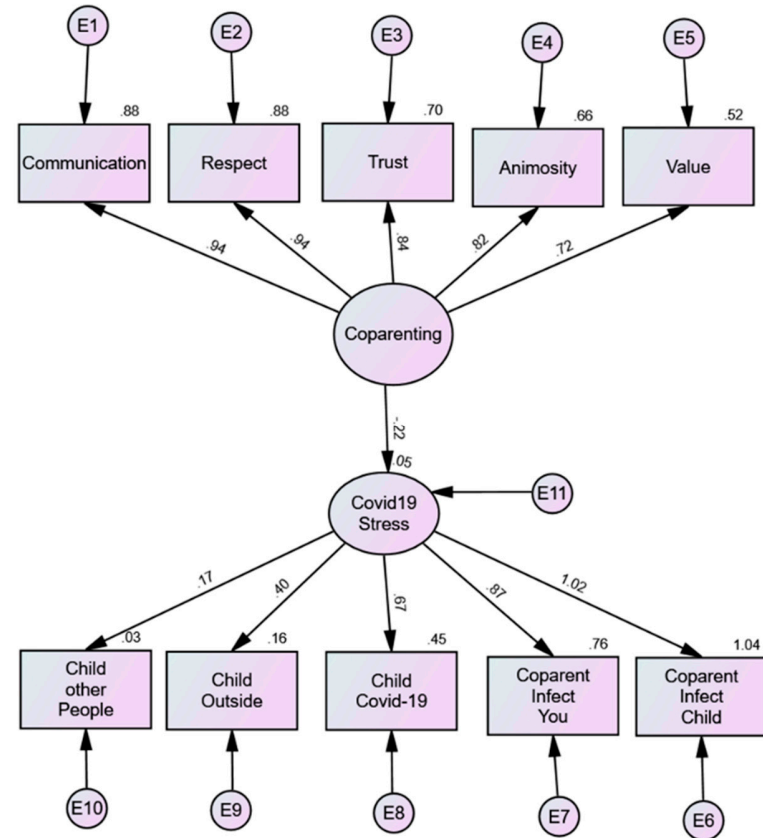

Figure S2. intact families.

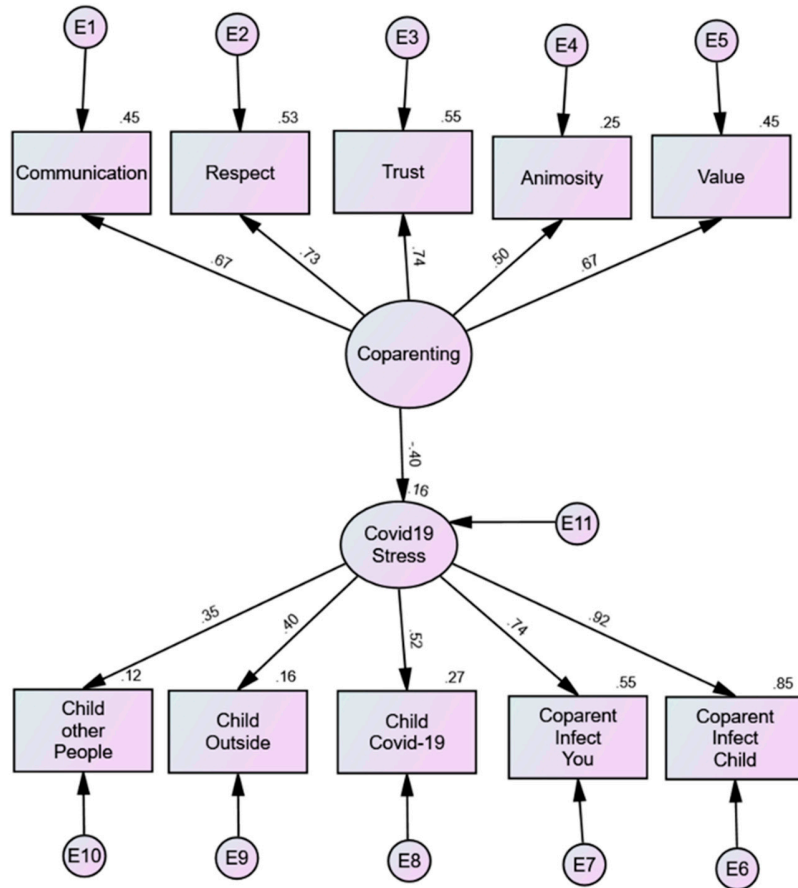

Figure S3. never together.

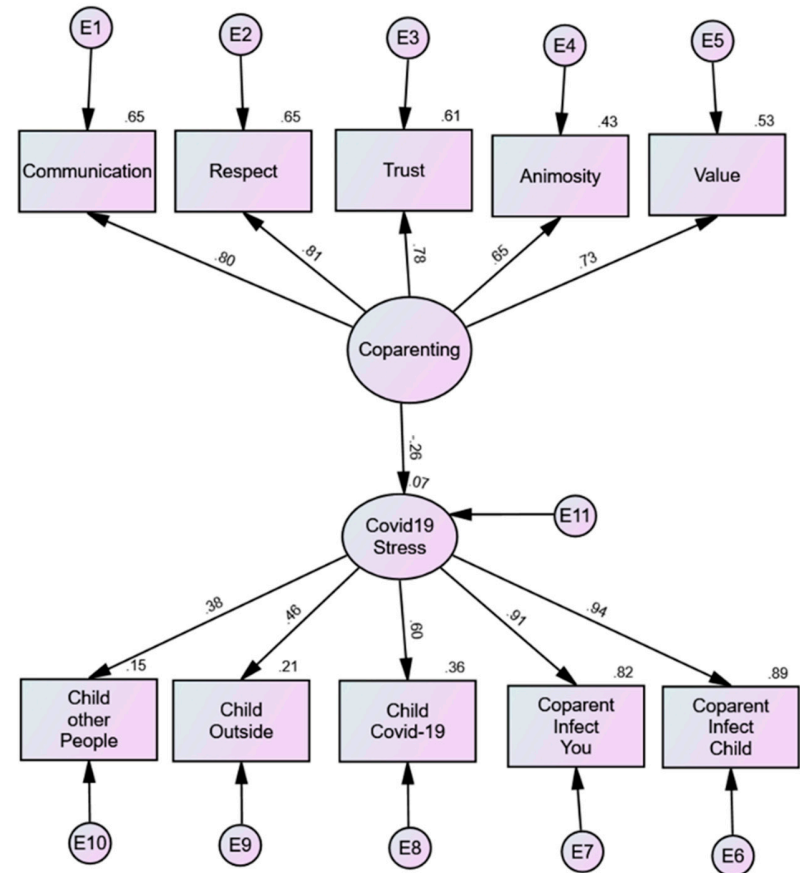

Figure S4. Divorced /separated.

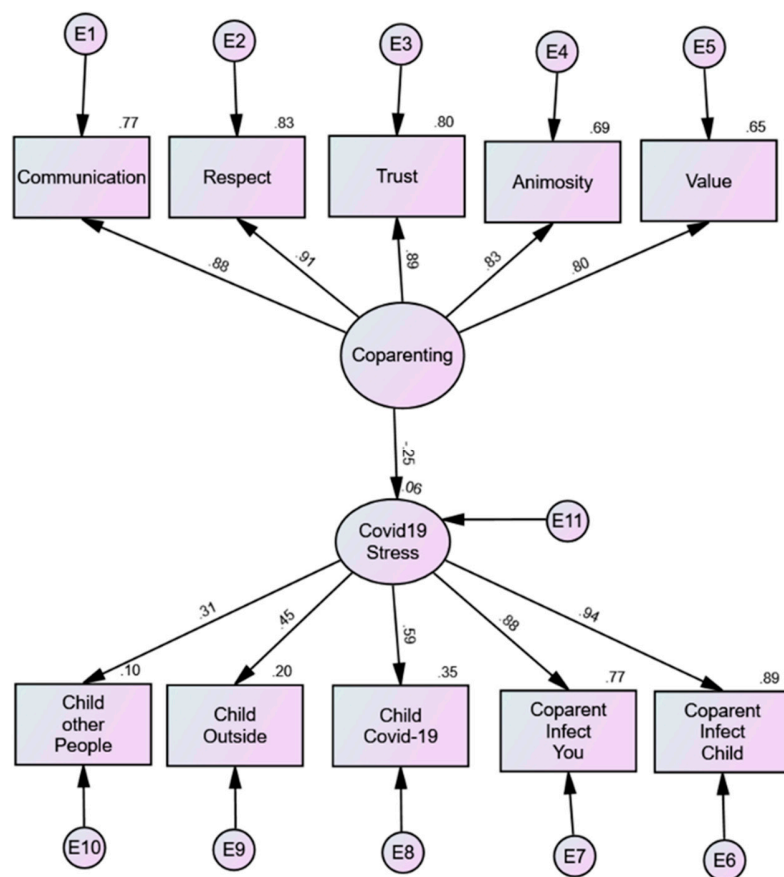

Figure S5. income above 60K.

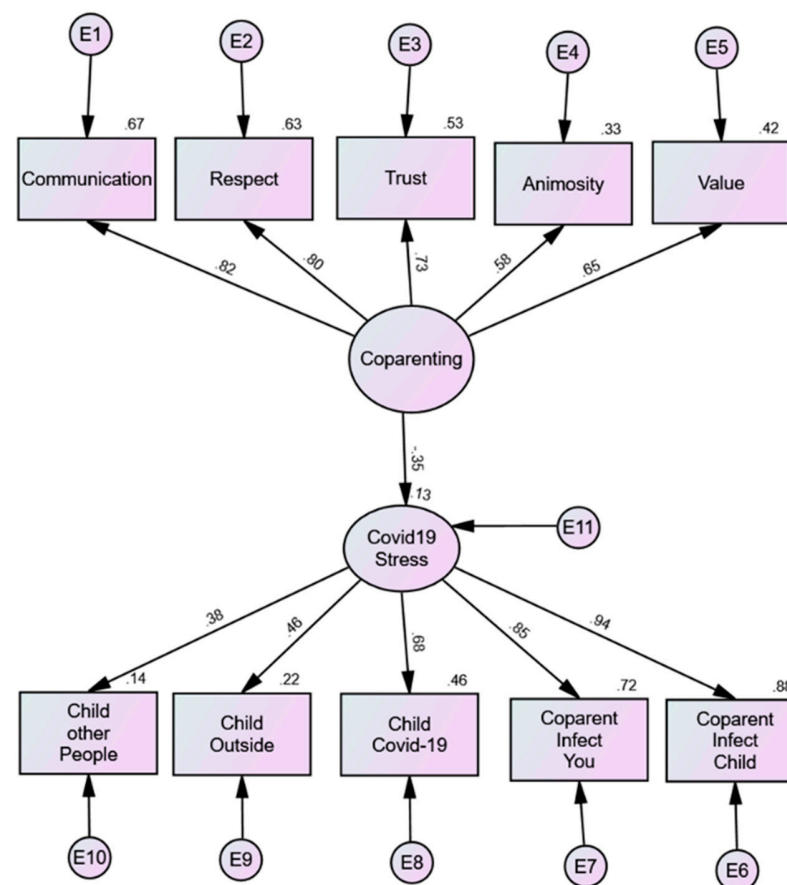

Figure S6. income below 60K.
